# Supplementary material for: Inventory Management with Auctions and Other Sales Channels: Optimality of (s, S) Policies
Source: Atypon-hosted journal article supplement (doi:10.1287/mnsc.1070.0767), 2008-01-01
Supplement: mnsc.1070.0767-sm-ec.pdf [file mnsc.1070.0767-sm-ec.pdf]

**e - c o m p a n i o n**

ONLY AVAILABLE IN ELECTRONIC FORM

Electronic Companion—“Inventory Management with Auctions  
and Other Sales Channels: Optimality of  $(s, S)$  Policies” by  
Woonghee Tim Huh and Ganesh Janakiraman,  
*Management Science*, doi 10.1287/mnsc.1070.0767.

---

## Appendices

### EC.1. Concavity of $L(\cdot)$ in Proposition 1

In this section, we prove that the maximum single-period profit  $L(y)$  is concave in  $y$ . This result is one of the components of Proposition 1.

We note  $y \in \mathcal{Z}$ . By part (a) of Proposition 1 and the definition of  $R(y, \mathbf{r})$ , it follows that

$$L(y) = R(y, \mathbf{r}_y) = E_{\mathbf{v}}[R(y, \mathbf{r}_y, \mathbf{v})]. \quad (\text{EC.1})$$

Now, we fix the the vector  $\mathbf{v}$ . From (4),

$$R(y, \mathbf{r}_y, \mathbf{v}) = \max_{k \in \mathcal{Z}^+} \{ J(v(1)) + J(v(2)) + \dots + J(v(k)) - g(y - k) \}.$$

For each nonnegative integer  $k$ , we let

$$\bar{J}(k, \mathbf{v}) = \begin{cases} 0, & \text{if } k = 0; \\ J(v(1)) + J(v(2)) + \dots + J(v(k)), & \text{if } k \in \{1, 2, \dots\}. \end{cases}$$

Observe that the marginal difference  $\bar{J}(k+1, \mathbf{v}) - \bar{J}(k, \mathbf{v})$  is  $J(v(k))$ ; the sequence  $\{J(v(k))\}$  is decreasing because  $J(\cdot)$  is an increasing function and  $\{v(k)\}$  is a decreasing sequence. Therefore,  $\bar{J}(k, \mathbf{v})$  is concave in  $k$  for every  $\mathbf{v}$ .

We extend the definition of  $\bar{J}(k, \mathbf{v})$  to  $\mathfrak{R}^+$  as follows: for  $k \in \mathfrak{R}^+$ , let

$$\bar{J}(k, \mathbf{v}) = ([k] - k) \cdot \bar{J}([k], \mathbf{v}) + (k - [k]) \cdot \bar{J}([k], \mathbf{v}).$$

That is, for any fixed  $\mathbf{v}$ ,  $\bar{J}(k, \mathbf{v})$  is a piecewise linear function of  $k$  with slope changes only at integers. Let  $\tilde{g}(\cdot)$  be a piecewise-linear extension of  $g(\cdot)$  to  $\mathfrak{R}$ . We also define, for  $y \in \mathfrak{R}$  and  $k \in \mathfrak{R}^+$ ,

$$\varphi(y, k, \mathbf{v}) = \bar{J}(k, \mathbf{v}) - \tilde{g}(y - k). \quad (\text{EC.2})$$

Thus, for each integer  $y$  and value vector  $\mathbf{v}$ , we have

$$R(y, \mathbf{r}_y, \mathbf{v}) = \max_{k \in \mathcal{Z}^+} \varphi(y, k, \mathbf{v}). \quad (\text{EC.3})$$

We claim that for any fixed  $\mathbf{v}$ ,  $\varphi(y, k, \mathbf{v})$  is jointly concave in  $(y, k)$  in  $\mathfrak{R} \times \mathfrak{R}^+$ . We know that  $\bar{J}(\cdot, \mathbf{v})$  is concave, and  $\tilde{g}(\cdot)$  is convex. Since  $y - k$  is a linear function of  $(y, k)$ , equation (EC.2) implies  $\varphi(y, k, \mathbf{v})$  is jointly concave in  $(y, k)$ .

Thus, for any fixed  $\mathbf{v}$  and integer  $y$ ,  $\varphi(y, k, \mathbf{v})$  is concave in  $k \in \mathfrak{R}^+$ . Since  $\varphi(y, k, \mathbf{v})$  is piecewise linear in  $k$  with slope changes only at integer points, there exists an integer value of  $k$  that maximizes  $\varphi(y, k, \mathbf{v})$ . Thus,

$$\max_{k \in \mathcal{Z}^+} \varphi(y, k, \mathbf{v}) = \max_{k \in \mathfrak{R}^+} \varphi(y, k, \mathbf{v}) . \quad (\text{EC.4})$$

Since  $\varphi(y, k, \mathbf{v})$  is a jointly concave function in  $(y, k) \in \mathfrak{R} \times \mathfrak{R}^+$ ,  $\max_{k \in \mathfrak{R}^+} \varphi(y, k, \mathbf{v})$  is concave with respect to  $y$  in  $\mathfrak{R}$ . Thus,  $\max_{k \in \mathfrak{R}^+} \varphi(y, k, \mathbf{v})$  is also concave, in the discrete sense, with respect to  $y$  in  $\mathcal{Z}$ . It follows from (EC.3) and (EC.4) that  $R(y, \mathbf{r}_y, \mathbf{v})$  is concave with respect to  $y$  in  $\mathcal{Z}$ . From (EC.1), we conclude  $L(y)$  is concave in  $y$ .

## EC.2. Proof of (8) in Lemma 1

In this section, we provide the proof of claim (8). We fix any  $\mathbf{v}$ , and show

$$R(y^2, \mathbf{r}, \mathbf{v}) - R(y^1, \tilde{\mathbf{r}}, \mathbf{v}) \leq R(y^2, \mathbf{r}_{y^2}, \mathbf{v}) - R(y^1, \mathbf{r}_{y^1}, \mathbf{v}) .$$

From the definition of  $\tilde{\mathbf{r}}$ , we get  $\tilde{r}(i) \leq v_{y^1}^*(i)$  for  $i \leq y^1$ , and  $\tilde{r}(i) = v_{y^1}^*(i)$  for  $i > y^1$ . Thus,  $\kappa(\mathbf{r}_{y^1}, \mathbf{v}) \leq \kappa(\tilde{\mathbf{r}}, \mathbf{v})$ . We consider two disjoint cases.

CASE A:  $\kappa(\mathbf{r}_{y^1}, \mathbf{v}) = \kappa(\tilde{\mathbf{r}}, \mathbf{v})$ .

First, we compare  $R(y^1, \mathbf{r}_{y^1}, \mathbf{v})$  and  $R(y^1, \tilde{\mathbf{r}}, \mathbf{v})$ . Now,  $I[v(i) \geq v_{y^1}^*(i)] = I[v(i) \geq \tilde{r}(i)]$  for each  $i$ , by the definition of  $\kappa$ . Then,

$$\begin{aligned} & [J(v(i)) + \Delta g(y^1 - i + 1)] \cdot I[v(i) \geq v_{y^1}^*(i)] \\ &= [J(v(i)) + \Delta g(y^1 - i + 1)] \cdot I[v(i) \geq \tilde{r}(i)], \end{aligned}$$

implying  $R(y^1, \mathbf{r}_{y^1}, \mathbf{v}) = R(y^1, \tilde{\mathbf{r}}, \mathbf{v})$  by (4). Also, we compare  $R(y^2, \mathbf{r}_{y^2}, \mathbf{v})$  and  $R(y^2, \mathbf{r}, \mathbf{v})$ . Observe from equation (4) that  $\mathbf{r}_{y^2}$  maximizes  $R(y^2, \mathbf{r}, \mathbf{v})$  for each  $\mathbf{v}$ . Therefore, we obtain  $R(y^2, \mathbf{r}_{y^2}, \mathbf{v}) \geq R(y^2, \mathbf{r}, \mathbf{v})$ . Thus, combining these two results, we obtain claim (8).

CASE B:  $\kappa(\mathbf{r}_{y^1}, \mathbf{v}) < \kappa(\tilde{\mathbf{r}}, \mathbf{v})$ .

Since  $\tilde{r}(i) = v_{y^1}^*(i)$  holds for  $i > y^1$ , by the definition of  $\tilde{\mathbf{r}}$ , it follows that

$$\kappa(\mathbf{r}_{y^1}, \mathbf{v}) < \kappa(\tilde{\mathbf{r}}, \mathbf{v}) \leq y^1.$$

From equation (4), we observe that if the following pair of inequalities holds for each positive integer  $i$ , then (8) holds.

$$[J(v(i)) + \Delta g(y^2 - i + 1)] \cdot I[v(i) \geq v_{y^2}^*(i)] \geq [J(v(i)) + \Delta g(y^1 - i + 1)] \cdot I[v(i) \geq v_{y^1}^*(i)] \quad (\text{EC.5})$$

and

$$[J(v(i)) + \Delta g(y^1 - i + 1)] \cdot I[v(i) \geq \tilde{r}(i)] \geq [J(v(i)) + \Delta g(y^2 - i + 1)] \cdot I[v(i) \geq r(i)]. \quad (\text{EC.6})$$

We first show (EC.5). For each  $i$ ,

$$\begin{aligned} & [J(v(i)) + \Delta g(y^2 - i + 1)] \cdot I[v(i) \geq v_{y^2}^*(i)] \\ &= [J(v(i)) + \Delta g(y^2 - i + 1)]^+ \\ &\geq [J(v(i)) + \Delta g(y^1 - i + 1)]^+ \\ &= [J(v(i)) + \Delta g(y^1 - i + 1)] \cdot I[v(i) \geq v_{y^1}^*(i)]. \end{aligned}$$

The equalities above follow from the definition of  $v_{y^2}^*$  and  $v_{y^1}^*$ . The inequality follows from the convexity of  $g$ .

Now, we show (EC.6) by considering two subcases.

- *Subcase B1:*  $i \in \{1, 2, \dots, y^1\}$ .

Since  $i \leq y^1$  and  $\Delta g(z) = h$  for all  $z > 0$ , observe from the definition of  $v_{y^1}^*$  that  $v_{y^1}^*(i) = J^{-1}(-h)$  holds. In this case,  $\tilde{r}(i)$  is either  $r(i)$  or  $v_{y^1}^*(i)$ .

If  $\tilde{r}(i) = v_{y^1}^*(i)$ , then

$$\begin{aligned} & [J(v(i)) + \Delta g(y^1 - i + 1)] \cdot I[v(i) \geq \tilde{r}(i)] \\ &= [J(v(i)) + h] \cdot I[v(i) \geq v_{y^1}^*(i)] \quad (\text{since } \tilde{r}(i) = v_{y^1}^*(i) \text{ and } y^1 - i + 1 > 0) \end{aligned}$$

$$\begin{aligned}
&= [J(v(i)) + h]^+ && \text{(since } v_{y^1}^*(i) = J^{-1}(-h)\text{)} \\
&\geq [J(v(i)) + h] \cdot I[v(i) \geq r(i)] && \text{(by a property of } [\cdot]^+\text{)} \\
&= [J(v(i)) + \Delta g(y^2 - i + 1)] \cdot I[v(i) \geq r(i)] && \text{(since } y^2 - i + 1 > 0\text{)} .
\end{aligned}$$

Otherwise,  $\tilde{r}(i) = r(i)$  holds. Then,

$$[J(v(i)) + \Delta g(y^1 - i + 1)] \cdot I[v(i) \geq \tilde{r}(i)] = [J(v(i)) + \Delta g(y^2 - i + 1)] \cdot I[v(i) \geq r(i)] ,$$

since  $\Delta g(y^1 - i + 1) = h = \Delta g(y^2 - i + 1)$ .

- *Subcase B2:  $i > y^1$ .*

Since  $\kappa(\tilde{\mathbf{r}}, \mathbf{v}) \leq y^1$  holds in Case B, it follows  $i > \kappa(\tilde{\mathbf{r}}, \mathbf{v})$ . Thus,  $I[v(i) \geq \tilde{r}(i)] = 0$ , implying

$$[J(v(i)) + \Delta g(y^1 - i + 1)] \cdot I[v(i) \geq \tilde{r}(i)] = 0 .$$

Furthermore, since  $i > y^1 > \kappa(\mathbf{r}_{y^1}, \mathbf{v})$ , we get  $i \geq \kappa(\mathbf{r}_{y^1}, \mathbf{v}) + 1$ . Thus,  $v(i) \leq v(\kappa(\mathbf{r}_{y^1}, \mathbf{v}) + 1)$ .

$$\begin{aligned}
J(v(i)) + \Delta g(y^2 - i + 1) &\leq J(v(i)) + h \\
&\leq J(v(\kappa(\mathbf{r}_{y^1}, \mathbf{v}) + 1)) + h \\
&\leq 0.
\end{aligned}$$

The first inequality follows from the convexity of  $g$  whose derivative is bounded above by  $h$ . The second inequality follows from the monotonicity of  $J$ . For the last inequality, observe that the virtual value from the  $(\kappa(\mathbf{r}_{y^1}, \mathbf{v}) + 1)$ 'th “highest” customer is smaller than  $-h$ , the holding cost savings from selling that unit.

Thus, we complete the proof of (EC.6) for both subcases B1 and B2. This completes the proof of (8) in Lemma 1.

### EC.3. Proof of Proposition 2

Let  $\tilde{\mathcal{D}}$  be the compact interval  $[d_L, d_U]$ . Thus,  $\mathcal{D}$  is the set of integers in  $\tilde{\mathcal{D}}$ . For any fixed integer  $y$  and  $d \in \mathcal{D}$ , define  $\pi(y, d) = \pi^1(d) + \pi^2(y - d)$ , where

$$\pi^1(d) = p(d) \cdot d , \quad \text{and}$$

$$\pi^2(r) = E[L_A(r - \epsilon_P)] .$$

Now, for any integer  $y$  and real  $d \in \tilde{\mathcal{D}}$ , define

$$\tilde{\pi}^1(d) = (1 - \lambda) \cdot \tilde{\pi}^1(\lfloor d \rfloor) + \lambda \cdot \tilde{\pi}^1(\lceil d \rceil)$$

where  $\lambda = d - \lfloor d \rfloor$ . Similarly, for any real  $r$ , define

$$\tilde{\pi}^2(r) = (1 - \lambda) \cdot \tilde{\pi}^2(\lfloor r \rfloor) + \lambda \cdot \tilde{\pi}^2(\lceil r \rceil)$$

where  $\lambda = r - \lfloor r \rfloor$ . For any real  $y$  and  $d \in \tilde{\mathcal{D}}$ , let

$$\tilde{\pi}(y, d) = \tilde{\pi}^1(d) + \tilde{\pi}^2(y - d) .$$

Since the expected revenue from the posted price channel,  $\pi^1(d) = p(d) \cdot d$ , is assumed to be concave with respect to  $d \in \mathcal{D}$ , its linear interpolation  $\tilde{\pi}^1(d)$  is also concave with respect to  $d \in \tilde{\mathcal{D}}$ . The concavity of  $L_A(t)$ , the maximum expected single-period profit from the auction channel, is proved in Proposition 1 of section 4. Thus,  $\tilde{\pi}(y, d)$  is jointly concave with respect to  $y$  and  $d$ . Thus,  $\max_{d \in \tilde{\mathcal{D}}} \tilde{\pi}(y, d)$  is concave with respect to  $y$ .

Moreover, from the construction of  $\tilde{\pi}$ , if  $y$  is an *integer*, then  $\tilde{\pi}(y, d)$  is a piece-wise linear interpolation of  $\pi(y, d)$  with respect to  $d$ . Thus, for fixed integer  $y$ , the single-dimensional function  $\tilde{\pi}(y, \cdot)$  has at least one integer maximizer, i.e.,

$$Q(y) = \max_{d \in \mathcal{D}} \pi(y, d) = \max_{d \in \tilde{\mathcal{D}}} \tilde{\pi}(y, d) .$$

The conclusions of the last two paragraphs together imply that  $Q(y)$  is concave with respect to  $y$ .

#### EC.4. Proof of Theorem 4

We need the following lemma about the optimal allocation problem which is useful in studying the multiple channel problem.

LEMMA EC.1. *For each  $i = 1, 2, \dots, I$ , let  $f_i(\cdot)$  be a quasi-concave function defined on a set of consecutive integers. Let  $s_i^*$  be a maximizer of  $f_i(\cdot)$ . Then,  $f(s) = \max\{\sum_i f_i(s_i) \mid \sum_i s_i = s\}$  is quasi-concave, and achieves its maximum at  $\sum_i s_i^*$ .*

*Proof.* First, we provide the proof assuming that the domain of  $f_i$  is the set of all integers. Since  $s_i^*$  is the maximizer of  $f_i(\cdot)$ , we have  $f_i(s_i) \leq f_i(s_i + 1)$  for  $s_i < s_i^*$ , and  $f_i(s_i) \geq f_i(s_i + 1)$  for  $s_i \geq s_i^*$ . Let  $s^* = \sum_i s_i^*$ .

Suppose  $s < s^*$ . Then, we claim that there exist  $s_1, s_2, \dots, s_I$  such that  $s = \sum_i s_i$  and  $f(s) = \sum_i f_i(s_i)$  satisfying  $s_i \leq s_i^*$  for each  $i$ . To see this claim, suppose that there exists  $j$  such that  $s_j > s_j^*$  and  $s_k < s_k^*$ . Then, by decreasing  $s_j$  by 1 and increasing  $s_k$  by 1, we weakly increase the objective function. By repeating this process, we prove the claim.

Furthermore, there exists  $i'$  such that  $s_{i'} < s_{i'}^*$ . Then,

$$f(s) = \sum_i f_i(s_i) = f_{i'}(s_{i'}) + \sum_{i \neq i'} f_i(s_i) \leq f_{i'}(s_{i'} + 1) + \sum_{i \neq i'} f_i(s_i) \leq f(s + 1).$$

Similarly, it can be argued that  $s > s^*$  implies  $f(s) \leq f(s - 1)$ .

If the domain of  $f_i$  is a subset of all integers, extend  $f_i$  by defining  $f_i(s_i) = -\infty$  for each  $s_i$  outside the domain.  $\square$

*Proof.* [Proof of Theorem 4] Let  $Q_m(y_m) = \max_{\mathbf{d}_m} \pi_m(y_m, \mathbf{d}_m)$ , and  $Q(y) = \max_{\mathbf{d}} \pi(y, \mathbf{d})$ . Since each sales channel  $m$  satisfies Condition 2,  $Q_m(\cdot)$  is quasi-concave. Let  $y_m^*$  be a maximizer of  $Q_m$ . Then, by Lemma EC.1,  $Q(\cdot)$  is also quasi-concave, and achieves its maximum at  $y^* = \sum_m y_m^*$ .

Consider two systems  $\tilde{\mathcal{A}}$  and  $\mathcal{A}$ , in which the inventory levels after replenishment are  $y^1$  and  $y^2$ , respectively. Assume  $y^* \leq y^1 < y^2$ . Suppose that in the  $\mathcal{A}$  system, the seller chooses an allocation of  $\mathbf{y} = (y_1, \dots, y_M)$  where  $y^2 = \sum_m y_m$ , and the sales lever vector of  $\mathbf{d} = (\mathbf{d}_1, \dots, \mathbf{d}_M)$ . For the  $\tilde{\mathcal{A}}$  system, we specify the allocation vector  $\tilde{\mathbf{y}} = (\tilde{y}_1, \dots, \tilde{y}_M)$  and the sales lever vector  $\tilde{\mathbf{d}} = (\tilde{\mathbf{d}}_1, \dots, \tilde{\mathbf{d}}_M)$  such that for each channel  $m$ , the pair of  $\tilde{y}_m$  and  $\tilde{\mathbf{d}}_m$  satisfy part (b) of Condition 2.

From  $\sum_m y_m^* = y^* \leq y^1 < y^2 = \sum_m y_m$ , there exists an allocation vector  $(\tilde{y}_1, \dots, \tilde{y}_M)$  satisfying  $y^1 = \sum_m \tilde{y}_m$ , and

$$\begin{aligned} \tilde{y}_m &= y_m, & \text{if } y_m < y_m^* \\ \tilde{y}_m &\in \{y_m^*, y_m^* + 1, \dots, y_m\}, & \text{if } y_m \geq y_m^*. \end{aligned}$$

We now construct the sales levers for the  $\tilde{\mathcal{A}}$  system. If  $\tilde{y}_m = y_m$ , set  $\tilde{\mathbf{d}}_m = \mathbf{d}_m$ , and we get, for every  $\epsilon_m$ ,

$$\tilde{y}_m - D_m(\tilde{\mathbf{d}}_m, \epsilon_m) = y_m - D_m(\mathbf{d}_m, \epsilon_m), \quad \text{and}$$

$$\pi_m(\tilde{y}_m, \tilde{\mathbf{d}}_m) = \pi_m(y_m, \mathbf{d}_m).$$

Otherwise, we have  $y_m^* \leq \tilde{y}_m < y_m$ . By Condition 2, there exists  $\tilde{\mathbf{d}}_m$  such that, for any  $\epsilon_m$ , we have

$$\tilde{y}_m - D_m(\tilde{\mathbf{d}}_m, \epsilon_m) \leq y_m - D_m(\mathbf{d}_m, \epsilon_m), \quad \text{and}$$

$$\pi_m(\tilde{y}_m, \tilde{\mathbf{d}}_m) \geq \pi_m(y_m, \mathbf{d}_m)$$

Therefore, for every  $\epsilon = (\epsilon_1, \dots, \epsilon_M)$ , it follows

$$\begin{aligned} y^1 - \sum_m D_m(\tilde{\mathbf{d}}, \epsilon_m) &\leq y^2 - \sum_m D_m(\mathbf{d}, \epsilon_m), \quad \text{and} \\ \pi(y^1, \tilde{\mathbf{d}}) &= \sum_m \pi_m(\tilde{y}_m, \tilde{\mathbf{d}}_m) \geq \sum_m \pi_m(y_m, \mathbf{d}_m) = \pi(y^2, \mathbf{d}), \end{aligned}$$

satisfying part (b) of Condition 2 for the multiple sales channel model.

Now consider the case  $y^* \geq y^1 > y^2$  under Condition 2\*. Here, set  $\tilde{y}_m = y_m$  if  $y_m > y_m^*$ ; otherwise, let  $y_m \leq \tilde{y}_m \leq y_m^*$ . A similar analysis can be applied.  $\square$

### EC.5. Proof of Theorem 5

We first prove the result assuming that both  $y$  and  $d_m$ 's are real-valued. Let  $(y^*, \mathbf{d}^*) = \arg \max \pi(y, \mathbf{d})$ . From the additivity of the demand function,  $d_m^* = \arg \max \Lambda_m(d_m)$  where each  $\Lambda_m$  is concave, and  $y^*$  is a minimizer of  $g(y|\mathbf{d}^*)$  where

$$g(y|\mathbf{d}) = h \cdot E[y - \sum_m d_m - \sum_m \epsilon_m]^+ + b \cdot E[y - \sum_m d_m - \sum_m \epsilon_m]^- .$$

Note that  $g(y|\mathbf{d})$  depends on  $y$  and  $\mathbf{d}$  only through  $y - \sum_m d_m$  in a convex manner.

The first part of Condition 1\* follows from the concavity of  $\max_{\mathbf{d}} \pi(y, \mathbf{d})$  in  $y$ . We will now prove part (b). Consider any  $y^1$  and  $y^2$  satisfying  $y^* \leq y^1 < y^2$ , and any  $\mathbf{d}^2 = (d_1^2, \dots, d_M^2)$ . Recall  $\mathbf{d}^* = \arg \max_{\mathbf{d}} \pi(y^*, \mathbf{d})$  and let  $\mathbf{d}^\circ = \arg \max_{\mathbf{d}} \{\pi(y^2, \mathbf{d}) \mid \sum_m d_m = \sum_m d_m^2\}$ . By an application of the proof of Lemma EC.1, we can assume, without loss of generality, that we have either (i)  $d_m^\circ \leq d_m^*$  for all  $m$ , or (ii)  $d_m^\circ \geq d_m^*$  for all  $m$ . If (i) occurs, set  $d_m^1 = d_m^*$  for each  $m$ . Thus,  $d_m^* = d_m^1 \geq d_m^\circ$  for each  $m$ , and  $y^* - \sum_m d_m^* \leq y^1 - \sum_m d_m^1 \leq y^2 - \sum_m d_m^\circ$ . Otherwise, in case of (ii), define  $\lambda = (y^1 - y^*) / (y^2 - y^*)$ . Then, set  $\mathbf{d}^1 = (d_1^1, d_2^1, \dots, d_M^1)$  such that

$$\sum_m d_m^1 = (1 - \lambda) \sum_m d_m^* + \lambda \sum_m d_m^\circ$$

$$d_m^1 \in \{d_m^*, d_m^\circ\} \quad \text{for each } m \neq m', \text{ and}$$

$$d_{m'}^1 \in [d_{m'}^*, d_{m'}^\circ],$$

for some  $m' \in \{1, \dots, M\}$ . It follows that  $y^1 - \sum_m d_m^1$  is a convex combination of  $y^* - \sum_m d_m^*$  and  $y^2 - \sum_m d_m^\circ$ . Therefore, in both cases, it is straightforward to show

$$\pi(y^1, \mathbf{d}^1) \geq \pi(y^2, \mathbf{d}^\circ) \geq \pi(y^2, \mathbf{d}^2), \quad \text{and}$$

$$y^1 - \sum_m D_m(d_m^1, \epsilon_m) \leq \max \left\{ y^2 - \sum_m D_m(d_m^\circ, \epsilon_m), y^* - \sum_m D_m(d_m^*, \epsilon_m) \right\},$$

where  $\mathbf{d}^1 = (d_1^1, \dots, d_M^1)$ . Since  $\sum_m D_m(d_m^\circ, \epsilon_m) = \sum_m D_m(d_m^2, \epsilon_m)$ , part (b) of Condition 1\* is satisfied.

For part (c), apply a similar analysis to the case of  $y^* \geq y^1 > y^2$ . If  $y^2 - \sum_m D_m(d_m^2, \epsilon_m) \leq y^* - \sum_m D_m(d_m^*, \epsilon_m)$ , then choose  $\mathbf{d}^1$  similar to the case (ii) above; otherwise, choose  $\mathbf{d}^1$  such that  $y^2 - \sum_m D_m(d_m^2, \epsilon_m) = y^1 - \sum_m D_m(d_m^1, \epsilon_m)$ , and  $d_m^* \geq d_m^1 \geq d_m^2$  for each channel  $m$ .

We remark that if  $y$  and  $d_m$ 's are integer-valued, then probabilistic rounding results in the required conclusions.

## EC.6. Proof of Lemma 4

For each  $t$ , we define  $L_t(\cdot)$  recursively as following:

$$L_t(y_t) = \begin{cases} \max_{d_t} \pi_t(y_t, d_t) + \alpha \cdot E[L_{t+1}(y_t - d_t - \epsilon_t)], & \text{if } t < T. \\ \max_{d_t} \pi_t(y_t, d_t), & \text{if } t = T. \end{cases}$$

By the convexity of  $\pi$ ,  $L_t$  is convex for each  $t$ . Let  $y^*$  be the maximizer of  $L_1$ .

Suppose  $y^* \leq y^1 \leq y^2$ . For a fixed sequence of  $\epsilon_1, \epsilon_2, \dots, \epsilon_T$ , let  $\mathcal{A}^*$  be the optimal system starting with the inventory level  $y^*$ . Let  $d_1^*, d_2^*, \dots, d_T^*$  be the optimal sequence of decisions in  $\mathcal{A}^*$ . (Clearly,  $d_t^*$  depends on  $\epsilon_1, \dots, \epsilon_{t-1}$ , but we suppress that dependence to simplify notation.) Let  $y_t^*$  be the beginning of sub-period inventory level in  $\mathcal{A}^*$ .

Consider two systems  $\tilde{\mathcal{A}}$  and  $\mathcal{A}$ , and suppose that the inventory levels at the beginning of sub-period  $t = 1$  are  $y^1$  and  $y^2$ , respectively. Suppose that for fixed  $\epsilon_1, \epsilon_2, \dots, \epsilon_T$ , the decisions of  $\mathcal{A}$  are given by  $d_1^2, d_2^2, \dots, d_T^2$ . Let  $\lambda \in [0, 1]$  such that  $y^1 = \lambda y^* + (1 - \lambda)y^2$ . For each  $t$ , choose the decision

$d_t^1$  of the  $\tilde{\mathcal{A}}$  system such that  $d_t^1 = \lambda d_t^* + (1 - \lambda)d_t^2$ . Let  $z_t^*$ ,  $z_t^1$  and  $z_t^2$  be the ending inventories in sub-period  $t$  in systems  $\mathcal{A}^*$ ,  $\tilde{\mathcal{A}}$  and  $\mathcal{A}$ , respectively. Thus, if  $y_t^1 = \lambda y_t^* + (1 - \lambda)y_t^2$ , then

$$\begin{aligned} z_t^1 &= y_t^1 - (d_t^1 + \epsilon_t) \\ &= [\lambda y_t^* + (1 - \lambda)y_t^2] - [\lambda d_t^* + (1 - \lambda)d_t^2 + \epsilon_t] \\ &= \lambda[y_t^* - d_t^* - \epsilon_t] + (1 - \lambda)[y_t^2 - d_t^2 - \epsilon_t] \\ &= \lambda z_t^* + (1 - \lambda)z_t^2. \end{aligned}$$

By induction, we show the above result for all  $t$ . Since  $z_T^* \leq y^*$ , it follows  $z_T^1 \leq \max\{z_T^2, y^*\}$ .

Furthermore, the expected single sub-period profit in  $t$  satisfies

$$\pi_t(y_t^1, d_t^1) \geq \lambda \cdot \pi_t(y_t^*, d_t^*) + (1 - \lambda) \cdot \pi_t(y_t^2, d_t^2),$$

where expectation is taken over  $\epsilon_t$ . Thus, the total expected profit in all  $T$  sub-periods satisfies

$$\sum_{t=1}^T \alpha^{t-1} \pi_t(y_t^1, d_t^1) \geq \lambda \cdot \sum_{t=1}^T \alpha^{t-1} \pi_t(y_t^*, d_t^*) + (1 - \lambda) \cdot \sum_{t=1}^T \alpha^{t-1} \pi_t(y_t^2, d_t^2).$$

Therefore, the total expected profit in the  $\tilde{\mathcal{A}}$  system (left-hand side) is at least the total expected profit in the  $\mathcal{A}$  system (last term on the right-hand side).
